# Supplementary material for: Microcurrent Reverses Cigarette Smoke-Induced Angiogenesis Impairment in Human Keratinocytes In Vitro
Source: MDPI journal article supplement (doi:10.3390/bioengineering9090445), 2022-09-06
Supplement: s1 [file s1]

# Supplementary marital: Microcurrent Reverses Cigarette Smoke-Induced Angiogenesis Impairment in Human Keratino-cytes In Vitro

**Table S1.** Top 100 transcription factors in Group 1.

| Rank | TF       | Score |
|------|----------|-------|
| 1    | SNAI1    | 11.33 |
| 2    | BCL6B    | 17.33 |
| 3    | CSRNP1   | 37    |
| 4    | FOXD1    | 37.5  |
| 5    | NR1H3    | 38.8  |
| 6    | CEBPB    | 46.33 |
| 7    | RFX8     | 47.5  |
| 8    | PPARG    | 48.2  |
| 9    | NFKB2    | 50.5  |
| 10   | ARID5A   | 52    |
| 11   | RUNX3    | 57.2  |
| 12   | RELB     | 58.5  |
| 13   | TCF21    | 61.5  |
| 14   | TBX21    | 67.5  |
| 15   | FOXC2    | 67.67 |
| 16   | FOSL1    | 71.6  |
| 17   | SNAI2    | 72.5  |
| 18   | FOXS1    | 74.67 |
| 19   | SOX17    | 75.5  |
| 20   | PPARD    | 78.75 |
| 21   | BATF3    | 91    |
| 22   | ZNF469   | 95    |
| 23   | EPAS1    | 95.5  |
| 24   | PBX4     | 96.67 |
| 25   | FOXP3    | 98.75 |
| 26   | EGR2     | 99    |
| 27   | GATA2    | 100.5 |
| 28   | ZNF267   | 101.3 |
| 29   | MEOX1    | 101.3 |
| 30   | ETV3L    | 102.7 |
| 31   | GLIS2    | 104.7 |
| 32   | PRRX1    | 105.7 |
| 33   | JUNB     | 108.8 |
| 34   | PRRX2    | 110   |
| 35   | SOX7     | 110   |
| 36   | NR4A3    | 111   |
| 37   | ETS1     | 112.3 |
| 38   | C11ORF95 | 113   |
| 39   | MEOX2    | 115.3 |

---

|    |         |       |
|----|---------|-------|
| 40 | SMAD3   | 115.6 |
| 41 | TFE3    | 116.7 |
| 42 | MTF1    | 124.5 |
| 43 | CEBPA   | 125.4 |
| 44 | ZBED3   | 126   |
| 45 | FOSL2   | 128   |
| 46 | KLF2    | 129.3 |
| 47 | NFE2L2  | 129.4 |
| 48 | ERG     | 131.6 |
| 49 | EOMES   | 136.2 |
| 50 | IRF1    | 136.7 |
| 51 | TAL1    | 140   |
| 52 | SOX18   | 140.3 |
| 53 | CREB3L2 | 140.7 |
| 54 | AEBP1   | 141.5 |
| 55 | IKZF1   | 143.3 |
| 56 | STAT5A  | 145.3 |
| 57 | HLX     | 148   |
| 58 | GTF2B   | 149.3 |
| 59 | ZBED2   | 151.3 |
| 60 | MAFB    | 151.5 |
| 61 | ZNF792  | 152   |
| 62 | ELK3    | 154   |
| 63 | STAT4   | 156.5 |
| 64 | TEAD1   | 159.3 |
| 65 | GLMP    | 162.5 |
| 66 | ZNF366  | 165.3 |
| 67 | HOXD8   | 165.7 |
| 68 | SPI1    | 165.8 |
| 69 | TCF7    | 169   |
| 70 | HOXD4   | 169.7 |
| 71 | ZNF80   | 170   |
| 72 | KLF4    | 171   |
| 73 | HHEX    | 171.5 |
| 74 | HMGA2   | 174.3 |
| 75 | GFI1    | 176.3 |
| 76 | ZNF587B | 178   |
| 77 | RARA    | 180.4 |
| 78 | NFKB1   | 182   |
| 79 | IRF7    | 183   |
| 80 | NFIL3   | 183.3 |
| 81 | NR2F2   | 184.4 |
| 82 | POU2F2  | 184.6 |
| 83 | MYC     | 186   |
| 84 | RELA    | 186.2 |
| 85 | FOXF1   | 191.3 |
| 86 | ZBTB14  | 192   |

---

|     |         |       |
|-----|---------|-------|
| 87  | LYL1    | 192.8 |
| 88  | HOXC6   | 193.3 |
| 89  | KDM2A   | 193.5 |
| 90  | BATF    | 195.2 |
| 91  | IRF4    | 196   |
| 92  | STAT1   | 199   |
| 93  | RBPJL   | 200   |
| 94  | RUNX1   | 201   |
| 95  | REL     | 202   |
| 96  | PRDM1   | 203.4 |
| 97  | TFAP2A  | 204.8 |
| 98  | ZNF385A | 205   |
| 99  | FOXO1   | 205.6 |
| 100 | NFATC4  | 206   |

**Table S2.** Top 100 transcription factors in Group 2.

| Rank | TF          | Score |
|------|-------------|-------|
| 1    | SOX18       | 9.333 |
| 2    | BCL6B       | 11.67 |
| 3    | GATA2       | 36.67 |
| 4    | SOX17       | 37.25 |
| 5    | SOX7        | 41.33 |
| 6    | NR1H4       | 51.67 |
| 7    | ERG         | 53.8  |
| 8    | ELK3        | 60.75 |
| 9    | SLC2A4RG    | 64.67 |
| 10   | AEBP1       | 72.5  |
| 11   | EPAS1       | 74.5  |
| 12   | GLIS2       | 77.67 |
| 13   | HEYL        | 81    |
| 14   | ARID3C      | 86.5  |
| 15   | CREB3L3     | 89.67 |
| 16   | HNF1B       | 90    |
| 17   | GSC         | 96    |
| 18   | HHEX        | 98.75 |
| 19   | NKX23       | 101   |
| 20   | HEY2        | 106.3 |
| 21   | SHOX2       | 107   |
| 22   | HNF4A       | 110.7 |
| 23   | SOX13       | 114.5 |
| 24   | PAX8        | 116.8 |
| 25   | ZNF467      | 125   |
| 26   | BORCS8MEF2B | 126   |
| 27   | CEBPE       | 127.7 |
| 28   | NR2F2       | 134.2 |
| 29   | NFE2        | 134.4 |
| 30   | SMAD3       | 135.2 |

---

|    |        |       |
|----|--------|-------|
| 31 | HAND1  | 139   |
| 32 | CENPX  | 141   |
| 33 | ZNF641 | 142.3 |
| 34 | LBX2   | 145   |
| 35 | FOXA3  | 146.7 |
| 36 | BCL6   | 153.8 |
| 37 | NFE4   | 154   |
| 38 | ATF3   | 158.7 |
| 39 | SPI1   | 161.3 |
| 40 | SNAI1  | 162.3 |
| 41 | LHX1   | 163   |
| 42 | CREB5  | 168.7 |
| 43 | SIX5   | 173.2 |
| 44 | DUX4   | 175   |
| 45 | NR2F6  | 176.8 |
| 46 | NR5A2  | 179.5 |
| 47 | HOXC4  | 180.3 |
| 48 | HNF1A  | 180.3 |
| 49 | USF1   | 180.4 |
| 50 | CEBPD  | 182   |
| 51 | EBF3   | 182   |
| 52 | LHX6   | 182.3 |
| 53 | MEIS1  | 183.2 |
| 54 | ETV3L  | 184.3 |
| 55 | RARA   | 185.2 |
| 56 | NR4A3  | 193.3 |
| 57 | MLXIPL | 195   |
| 58 | HES1   | 196   |
| 59 | SP110  | 200.3 |
| 60 | HOXA6  | 207   |
| 61 | ATF5   | 209   |
| 62 | GCM1   | 210   |
| 63 | TCF15  | 210   |
| 64 | TEAD2  | 210.5 |
| 65 | HOXC6  | 212.3 |
| 66 | HLX    | 214.7 |
| 67 | TBX2   | 215.3 |
| 68 | TEAD4  | 218.7 |
| 69 | EGR2   | 218.7 |
| 70 | IRF4   | 218.8 |
| 71 | ANHX   | 220.5 |
| 72 | NR1I2  | 221.3 |
| 73 | ZNF366 | 225.3 |
| 74 | CEBPB  | 226.2 |
| 75 | STAT3  | 226.2 |
| 76 | TFAP2A | 227.3 |
| 77 | KDM5B  | 227.4 |

---

|     |        |       |
|-----|--------|-------|
| 78  | IRF1   | 230.2 |
| 79  | NFE2L2 | 234   |
| 80  | ZIC3   | 235.3 |
| 81  | TET2   | 236   |
| 82  | FOXC1  | 236.3 |
| 83  | HOXB4  | 236.8 |
| 84  | KLF4   | 237.6 |
| 85  | FOSL2  | 240.4 |
| 86  | ELF1   | 242   |
| 87  | ZNF792 | 243.7 |
| 88  | HOXB3  | 244.3 |
| 89  | LHX9   | 244.7 |
| 90  | TBX21  | 250.5 |
| 91  | SRY    | 250.8 |
| 92  | LYL1   | 252.6 |
| 93  | GFI1B  | 253.6 |
| 94  | ZNF764 | 256.7 |
| 95  | ZNF319 | 258.3 |
| 96  | ZFHX4  | 258.3 |
| 97  | HOXA9  | 261.5 |
| 98  | GATA4  | 262.6 |
| 99  | GATA3  | 263.5 |
| 100 | FLI1   | 266   |

**Table S3.** The 68 transcription factors in Group 1 after excluding the overlap with Group 2.

| Number | TF     |
|--------|--------|
| 1      | CSRNP1 |
| 2      | FOXD1  |
| 3      | NR1H3  |
| 4      | RFX8   |
| 5      | PPARG  |
| 6      | NFKB2  |
| 7      | ARID5A |
| 8      | RUNX3  |
| 9      | RELB   |
| 10     | TCF21  |
| 11     | FOXC2  |
| 12     | FOSL1  |
| 13     | SNAI2  |
| 14     | FOXS1  |
| 15     | PPARD  |
| 16     | BATF3  |
| 17     | ZNF469 |
| 18     | PBX4   |
| 19     | FOXP3  |
| 20     | ZNF267 |
| 21     | MEOX1  |
| 22     | PRRX1  |
| 23     | JUNB   |
| 24     | PRRX2  |

|    |          |
|----|----------|
| 25 | ETS1     |
| 26 | C11ORF95 |
| 27 | MEOX2    |
| 28 | TFE3     |
| 29 | MTF1     |
| 30 | CEBPA    |
| 31 | ZBED3    |
| 32 | KLF2     |
| 33 | EOMES    |
| 34 | TAL1     |
| 35 | CREB3L2  |
| 36 | IKZF1    |
| 37 | STAT5A   |
| 38 | GTF2B    |
| 39 | ZBED2    |
| 40 | MAFB     |
| 41 | STAT4    |
| 42 | TEAD1    |
| 43 | GLMP     |
| 44 | HOXD8    |
| 45 | TCF7     |
| 46 | HOXD4    |
| 47 | ZNF80    |
| 48 | HMGA2    |
| 49 | GFI1     |
| 50 | ZNF587B  |
| 51 | NFKB1    |
| 52 | IRF7     |
| 53 | NFIL3    |
| 54 | POU2F2   |
| 55 | MYC      |
| 56 | RELA     |
| 57 | FOXF1    |
| 58 | ZBTB14   |
| 59 | KDM2A    |
| 60 | BATF     |
| 61 | STAT1    |
| 62 | RBPJL    |
| 63 | RUNX1    |
| 64 | REL      |
| 65 | PRDM1    |
| 66 | ZNF385A  |
| 67 | FOXO1    |
| 68 | NFATC4   |

**Table S4.** Densitometry Readings/intensity Ratio of western blot.

|        | pAkt / GAPDH | pErk1/2 / GAPDH | pNfkb / GAPDH | p27HSP / GAPDH |
|--------|--------------|-----------------|---------------|----------------|
| Ctrl   | 1.000        | 1.00000         | 1.00000       | 1.00000        |
| CSE    | 0.6123       | 1.470           | 1.725         | 1.633          |
| MC     | 1.538        | 2.640           | 1.228         | 1.408          |
| MC+CSE | 2.990        | 3.384           | 1.367         | 1.551          |

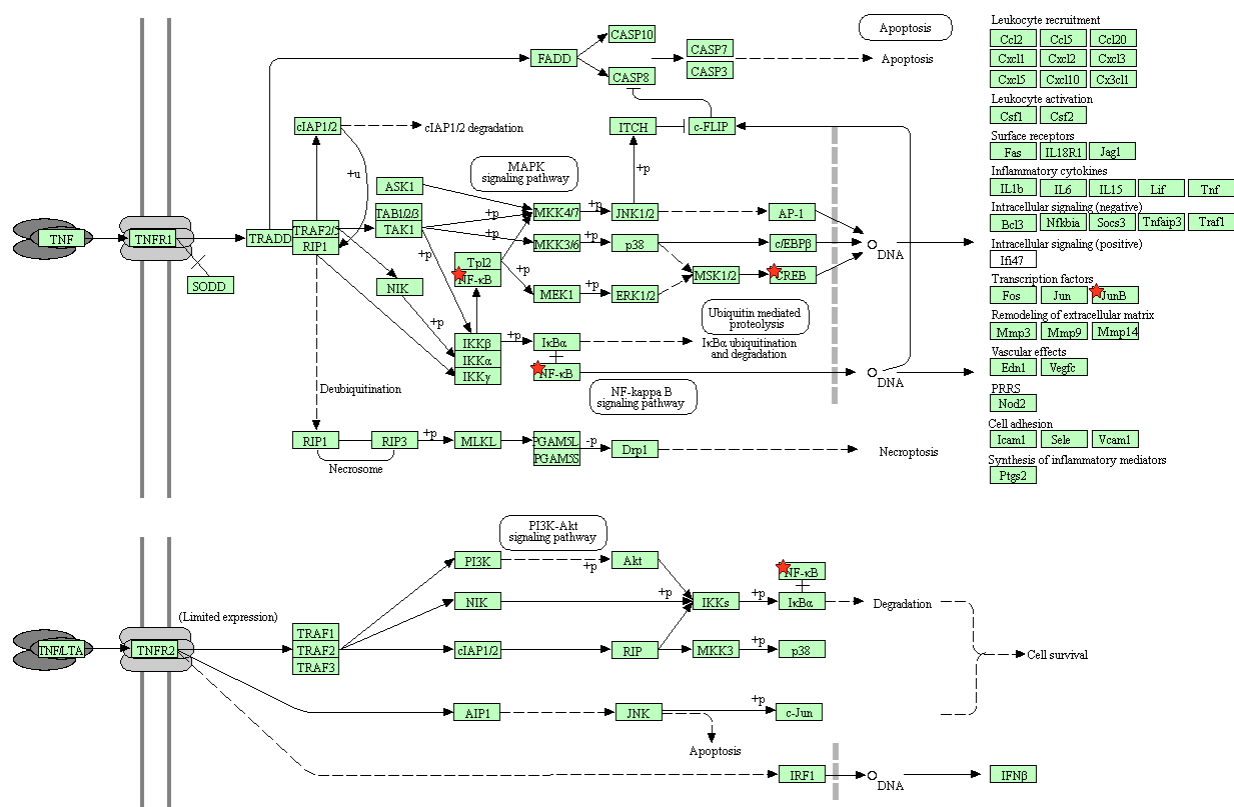

**Figure S1.** KEGG enrichment analysis suggested that PI3K-AKT, MAPK, and NF-κB signaling pathways may be activated. Stars indicate the transcription factors were enriched.

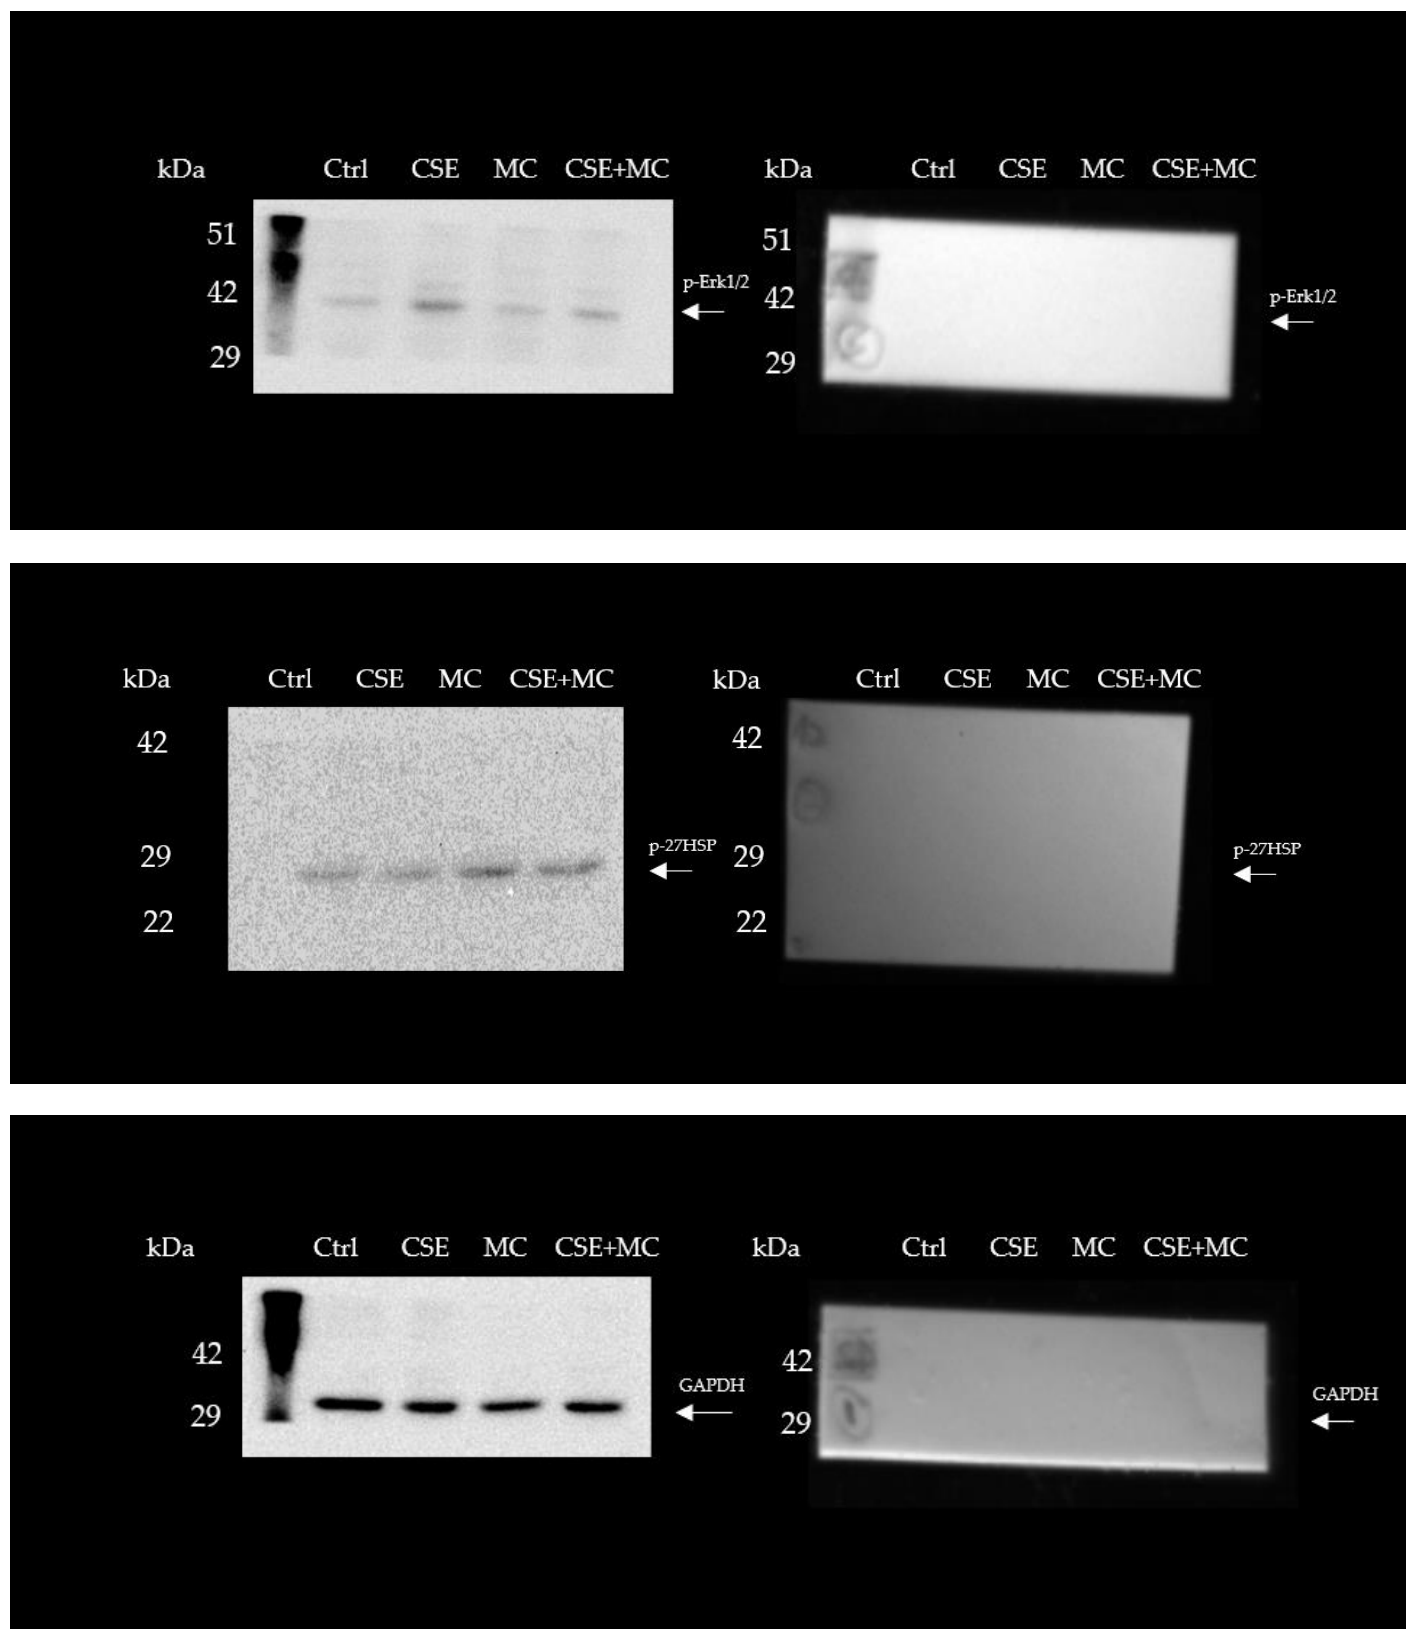

**Figure S2.** Representative Western blot (left) and the corresponding plain images(right) for phospho-AKT, phospho-NFκB, phospho-Erk1/2, and phospho-HSP27 in HaCaT cells 30 min after 100 μA MC exposure. The expression of GAPDH was used as a loading control.



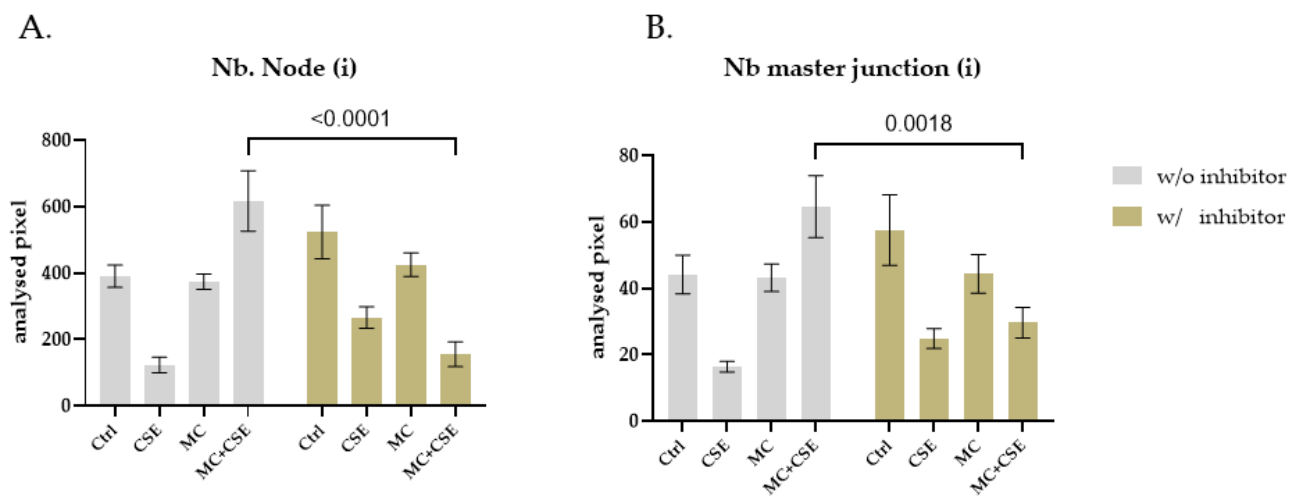

**Figure S3.** The addition of PI3K-AKT signaling pathway inhibitor SC394003 significantly reduced the levels of tube-forming indicators (A) Nb.Node and (B) Nb.Node in the MC+CSE group compared with the non-inhibitor groups, whereas in the other groups, the inhibitory effect of this inhibitor on tube-forming indicators was not significant. N = 3, n = 3. Data were compared by non-parametric two-way ANOVA followed by Tukey's multiple comparison tests.
